# Supplementary material for: Web Use for Symptom Appraisal of Physical Health Conditions: A Systematic Review
Source: PubMed Central journal article supplement (PMC5487739; doi:10.2196/jmir.6755), 2017-06-13
Supplement: jmir_v19i6e202_app2.pdf [file jmir_v19i6e202_app2.pdf]

## Multimedia Appendix 2

Data extraction sheet

|                                                       |  |             |  |              |  |               |  |
|-------------------------------------------------------|--|-------------|--|--------------|--|---------------|--|
| <b>Reference number</b>                               |  |             |  |              |  |               |  |
| <b>Title:</b>                                         |  |             |  |              |  |               |  |
| <b>Author:</b>                                        |  |             |  |              |  |               |  |
| <b>Source:</b>                                        |  |             |  |              |  |               |  |
| <b>Date:</b>                                          |  | <b>Vol:</b> |  | <b>Part:</b> |  | <b>Pages:</b> |  |
| <b>Objective:</b>                                     |  |             |  |              |  |               |  |
| <b>Setting:</b>                                       |  |             |  |              |  |               |  |
| <b>Study design:</b>                                  |  |             |  |              |  |               |  |
| <b>Procedure:</b>                                     |  |             |  |              |  |               |  |
| <b>Study population:</b>                              |  |             |  |              |  |               |  |
| <b>Sampling method:</b>                               |  |             |  |              |  |               |  |
| <b>Entry and exclusion criteria for participants:</b> |  |             |  |              |  |               |  |
| <b>Sample size:</b>                                   |  |             |  |              |  |               |  |
| <b>Measures</b>                                       |  |             |  |              |  |               |  |
| <b>Nature of measures:</b>                            |  |             |  |              |  |               |  |
| <b>Quantitative analysis</b>                          |  |             |  |              |  |               |  |

|                                           |  |
|-------------------------------------------|--|
| <b>What statistical tests were used?:</b> |  |
| <b>Power calculation?:</b>                |  |
| <b>Qualitative analysis</b>               |  |
| <b>Methodology?</b>                       |  |
| <b>Synthesis method?</b>                  |  |
| <b>Relevant findings:</b>                 |  |
| <b>Authors' conclusions:</b>              |  |
| <b>Limitations</b>                        |  |
| <b>Reviewer's conclusions</b>             |  |
